# Supplementary material for: Enhanced performance of perovskite solar cells via anti-solvent nonfullerene Lewis base IT-4F induced trap-passivation
Source: Royal Society of Chemistry journal article supplement (doi:10.1039/c8ta00583d), 2018-01-01
Supplement: c8ta00583d1.pdf [file c8ta00583d1.pdf]

Supplementary Information

**Enhanced Performance of Perovskite Solar Cells via Anti-Solvent  
Nonfullerene Lewis Base IT-4F Induced Trap-Passivation**

Yaxiong Guo<sup>a</sup>, Junjie Ma<sup>a</sup>, Hongwei Lei<sup>b</sup>, Fang Yao<sup>a</sup>, Borui Li<sup>a</sup>, Liangbin  
Xiong<sup>c</sup>, Guojia Fang<sup>a\*</sup>

*<sup>a</sup> Key Lab of Artificial Micro- and Nano-Structures of Ministry of  
Education of China, School of Physics and Technology, Wuhan  
University, Wuhan 430072, P. R. China. \*E-mail: [gjfang@whu.edu.cn](mailto:gjfang@whu.edu.cn)*

*<sup>b</sup> Department of physics, College of Science, Huazhong Agricultural  
University, Wuhan 430070, P. R. China.*

*<sup>c</sup> School of Physics and Electronic-information Engineering, Hubei  
Engineering University, Xiaogan, 432000, P. R. China.*

## Experimental section

### *Materials synthesis and perovskite film fabrication:*

CH<sub>3</sub>NH<sub>3</sub>I (MAI, 99.999%), PbI<sub>2</sub> (99.999%), DMSO (99.999%) and DMF (99.8%) were purchased from Aladdin. [6,6]-phenyl-C61-butyric acid methyl ester (PCBM) was obtained from NANO-C. All the remaining chemical medicine and reagents were purchased from Sigma-Aldrich. The standard precursor solution was prepared in a glovebox by dissolving the MAI (190.8 mg) and PbI<sub>2</sub> (553.2 mg) in DMF/DMSO (0.8 mL: 0.2 mL). The precursor solution was stirred at 60°C and aged for 12 h before spin coating. The FTO substrates were ultrasonically cleaned with deionized water, ethanol, and acetone successively. The as-cleaned substrates were heated in an oven at 60°C for 1 h followed by the UV–ozone treatment for 15 min. The Li-NiO<sub>x</sub> hole transport layer was deposited on the FTO substrate at 450°C by a spray pyrolysis method. Then, the perovskite precursor solution was spin coated onto the FTO/NiO<sub>x</sub> substrates at 4000 rpm for 30 s, followed by annealing at 100°C for 10 min to promote the crystal growth and eliminate the by-product. Notably, the antisolvent was added at 24 s during the spin-coating process. The electron transfer layer was spin-coated using chlorobenzene solution containing PCBM (20 mg mL<sup>-1</sup>) at 2000 rpm for 30 s and then the substrate was baked at 80°C for 10 min. Finally, BCP thin layer (0.5 mg in 1 mL alcohol) was deposited on

the top of PCBM layer and an Ag counter electrode was formed by thermal evaporation. The active area was 0.09 cm<sup>2</sup>.

*Perovskite film characterization and device characterization:*

A cold field emission scanning electron microscope (JSM 6700F, Japan) was used to characterize the morphology of the MAPbI<sub>3</sub> film. The process of crystal growth and transformation was analyzed by an X-ray diffractometer (D8 Advance, Bruker AXS, Germany) with a monochromatic Cu K $\alpha$  radiation source ( $\lambda$ =1.54056 Å) and an ultraviolet-visible (UV-vis) spectrophotometer (CARY5000, Varian, Australia). The chemical composition and kinetic energy spectra of the Li-NiO<sub>x</sub> films were characterized by an ultraviolet photoelectron spectroscopy (UPS) system (Thermo Scientific, Escalate 250Xi). The space charge limited current (SCLC) was obtained by a 2400 Source Meter in a dark environment, under bias from 0.008 V to 2 V. The electrochemical impedance spectroscopy (EIS) of the devices was performed using an electrochemical workstation (CHI 660D, Shanghai Chenhua Instruments, China). The **J–V curves** and **stabilized J<sub>sc</sub>** were recorded using an electrochemical workstation (CHI 660D, Shanghai Chenhua Instruments, China) under 3A grade AM 1.5G simulated sunlight (100 mW cm<sup>-2</sup>) (ABET Sun 2000 Solar Simulator). The incident light intensity was calibrated with an NREL-calibrated Si solar cell (Newport, Stratford Inc., 91 150 V). The scan rate

was 50 mV s<sup>-1</sup> and delay time was 2 s. The reverse scan was from 1.2 V to -0.2 V, while the forward scan was from -0.2 V to 1.2 V. The incident photon conversion efficiency (**IPCE**) was measured by the direct current (DC) mode using a custom QE/IPCE measurement system (Enli Technology Co. Ltd. China). These characterizations of the PSCs without encapsulation were carried out under ambient air conditions.

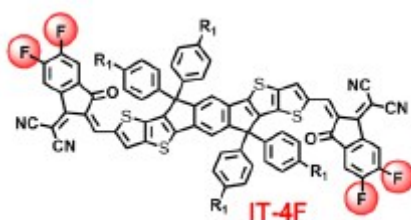

**Figure S1.** Molecular structure of the IT-4F.

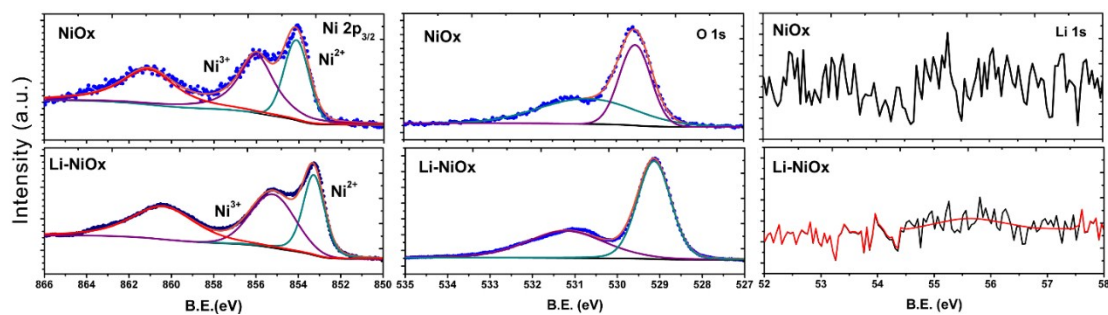

**Figure S2.** High resolution XPS profiles for the Ni, O and Li elements in the NiO<sub>x</sub> and Li:NiO<sub>x</sub> films, respectively.

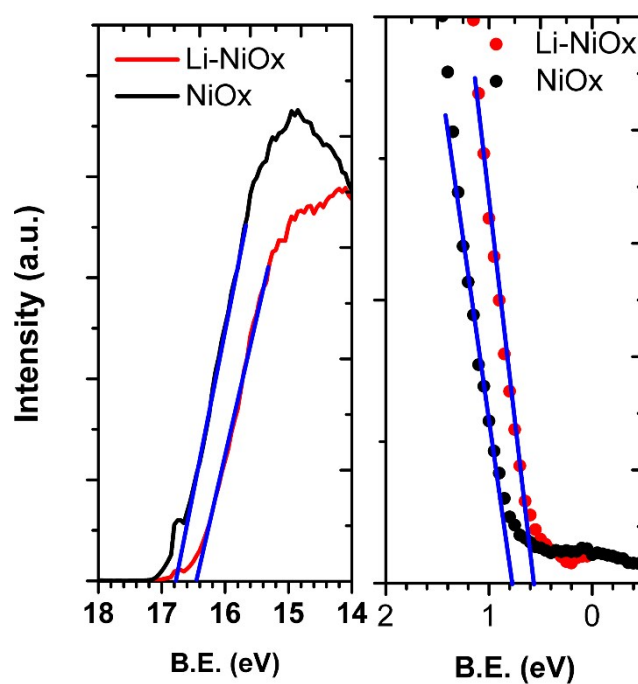

**Figure S3.** The UPS spectra of the NiO<sub>x</sub> and Li:NiO<sub>x</sub> film coated on silicon wafer.

The obtained Li content for the films prepared with 310 $\mu$ l Li-TFsi precursor is  $\approx$ 1.33% indicating that Li is readily incorporated into NiO<sub>x</sub>. The peak centered at 861.0 eV corresponds to a shake-up process in the cubic rocksalt structured NiO. The main peak centered at 854.2 eV is ascribed to the standard Ni-O octahedral bonding configuration. The peaks centered around 855–856 eV are ascribed to Ni<sup>2+</sup> vacancy-induced Ni<sup>3+</sup> state. These Ni<sup>2+</sup> vacancies induce positive charge compensation, and result in the p-type conductivity property of NiO<sub>x</sub>. Typically, the peak centered at 855.5 eV corresponds to Ni<sub>2</sub>O<sub>3</sub> species. Similarly, the peak at 529.5 eV is indicative of Ni-O octahedral bonding in NiO. The peak at 531.1 eV is ascribed to the Ni<sub>2</sub>O<sub>3</sub> species or hydroxyl groups absorbed on the surface. Considering the insulating nature of stoichiometric NiO, the nonstoichiometric composition, determined from the XPS studies, endows prepared Li-NiO<sub>x</sub> hole transport ability.

Obtained work function ( $\phi$ ) values by UPS measurements demonstrate that  $\phi$  increased from 4.4 eV for undoped films to 4.8 eV for Li:NiO<sub>x</sub> films. Meanwhile, compared to un-doped NiO<sub>x</sub> films, Li-doping shift up the valence band, which provided better band alignment and conductivity, facilitating improved hole extraction.

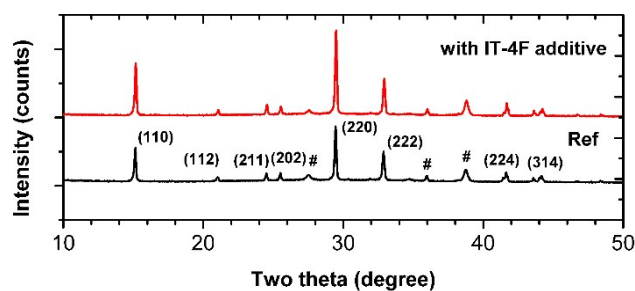

**Figure S4.** X-ray diffraction patterns of urea (powder) and perovskite film without and with IT-4F additive. Peaks indexed # originate from FTO.

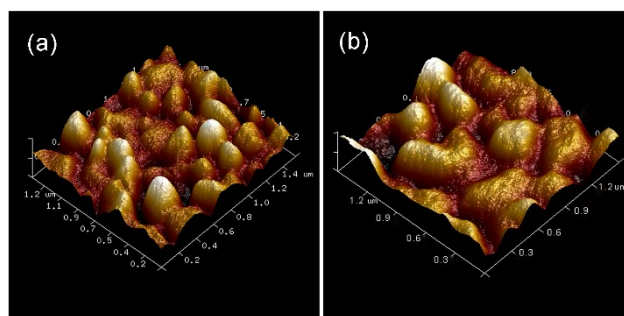

**Figure S5.** Atomic force microscopy (AFM) images of (a) bare MAPbI<sub>3</sub> and (b) MAPbI<sub>3</sub> with IT-4F additive on Li-NiO<sub>x</sub> coated FTO substrates.

**Table S1.** Fitting parameters of bi-exponential decay function in time-resolved PL spectra.

| Films              | A <sub>1</sub> | τ <sub>1</sub><br>(ns) | A <sub>2</sub> | τ <sub>2</sub><br>(ns) | Average<br>decay time τ<br>(ns) <sup>a</sup> |
|--------------------|----------------|------------------------|----------------|------------------------|----------------------------------------------|
| Perovskite         | 258.2          | 134.7                  | 319.0          | 50.1                   | 87.9                                         |
| Perovskite (IT-4F) | 291.1          | 504.5                  | 267.5          | 88.9                   | 305.4                                        |

<sup>a</sup> Average decay time is calculated according to the equation:  $\tau = (A_1\tau_1 + A_2\tau_2)/(A_1 + A_2)$ .

**Table S2.** Fitting parameters of bi-exponential decay function in transient photovoltage measurement.

| Films              | A <sub>1</sub> | τ <sub>1</sub><br>(ms) | A <sub>2</sub> | τ <sub>2</sub><br>(ms) | Average<br>decay time τ<br>(ms) <sup>a</sup> |
|--------------------|----------------|------------------------|----------------|------------------------|----------------------------------------------|
| Perovskite         | 0.245          | 0.054                  | 0.422          | 0.007                  | 0.024                                        |
| Perovskite (IT-4F) | 0.268          | 0.061                  | 0.625          | 0.015                  | 0.029                                        |

<sup>a</sup> Average decay time is calculated according to the equation:  $\tau = (A_1\tau_1 + A_2\tau_2)/(A_1 + A_2)$ .

**Table S3.** Fitting parameters of bi-exponential decay function in transient photocurrent measurement.

| Films              | A <sub>1</sub> | τ <sub>1</sub><br>(μs) | A <sub>2</sub> | τ <sub>2</sub><br>(μs) | Average<br>decay time τ<br>(μs) <sup>a</sup> |
|--------------------|----------------|------------------------|----------------|------------------------|----------------------------------------------|
| Perovskite         | 0.081          | 0.310                  | 0.081          | 0.310                  | 0.310                                        |
| Perovskite (IT-4F) | 0.093          | 0.317                  | 0.093          | 0.317                  | 0.317                                        |

<sup>a</sup> Average decay time is calculated according to the equation:  $\tau = (A_1\tau_1 + A_2\tau_2)/(A_1 + A_2)$ .



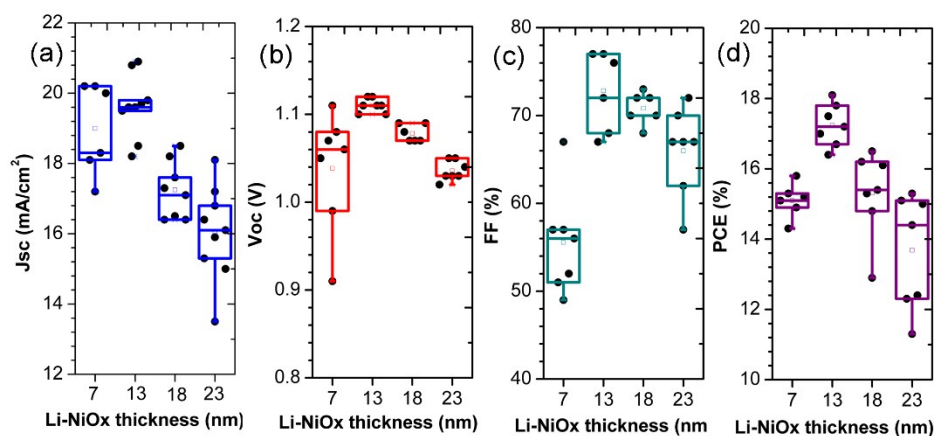

**Figure S6.** Photovoltaic performance of MAPbI<sub>3</sub> PSCs with various thickness of Li-NiO<sub>x</sub> as HTMs. (a)  $J_{SC}$ , (b)  $V_{OC}$ , (c) FF, and (d) PCE measured under reverse voltage scans.

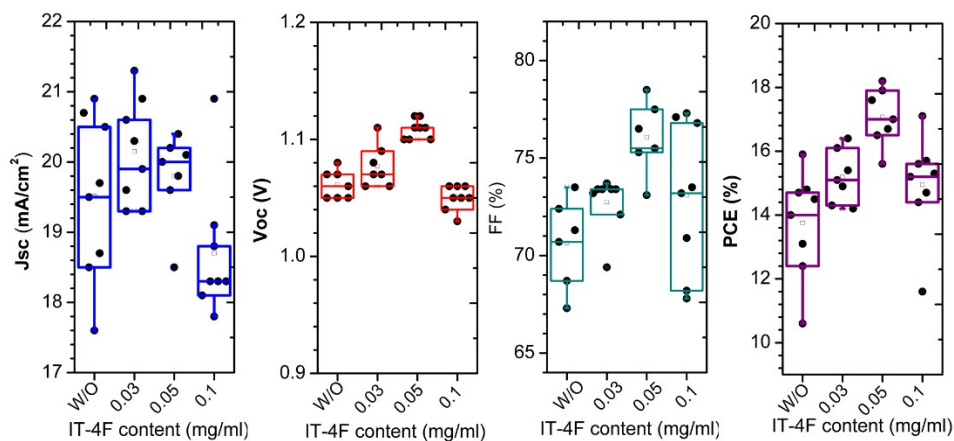

**Figure S7.** Photovoltaic performance of MAPbI<sub>3</sub> PSCs with various concentrations of IT-4F additives in the anti-solvent. (a)  $J_{SC}$ , (b)  $V_{OC}$ , (c) FF, and (d) PCE measured under reverse voltage scans.

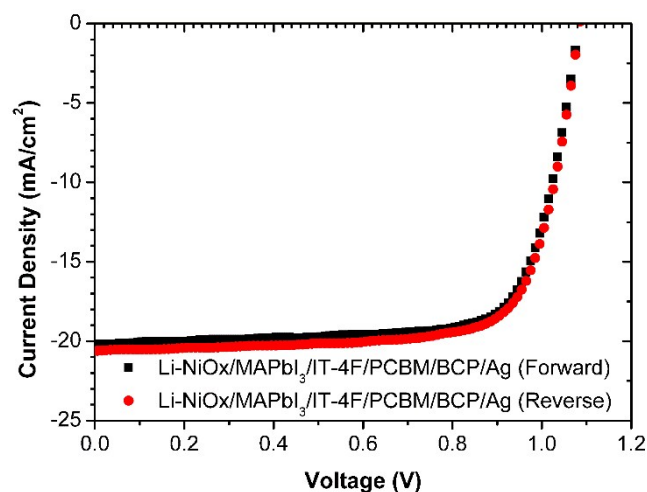

**Figure S8.** Parameter of devices based on polymer IT-4F as ultrathin interlayer between Perovskite and PCBM.

**Table S4.** Parameter of devices based on polymer IT-4F as ultrathin interlayer between Perovskite and PCBM.

| Devices          |    | $J_{SC}$<br>(mA/cm <sup>2</sup> ) | $V_{OC}$<br>(V) | FF<br>(%) | PCE<br>(%) |
|------------------|----|-----------------------------------|-----------------|-----------|------------|
| IT-4F interlayer | RS | 20.16                             | 1.08            | 75.32     | 16.40      |
|                  | FS | 20.60                             | 1.08            | 74.88     | 16.66      |

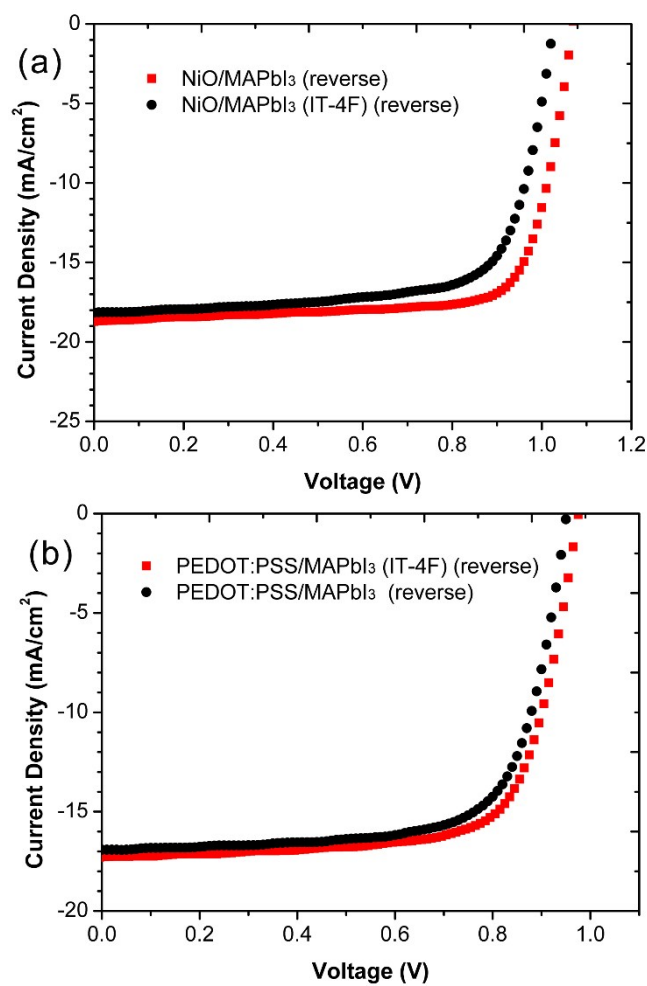

**Figure S9.** J-V curves of undoped NiO<sub>x</sub> and PEDOT:PSS based cells.

**Table S4.** Parameter of undoped NiO<sub>x</sub> and PEDOT:PSS based cells.

| HTMs              |    | $J_{SC}$<br>(mA/cm <sup>2</sup> ) | $V_{OC}$<br>(V) | FF<br>(%) | PCE<br>(%) |
|-------------------|----|-----------------------------------|-----------------|-----------|------------|
| NiO               | FS | 18.16                             | 1.025           | 72.23     | 13.45      |
| NiO (IT-4F)       | RS | 18.72                             | 1.065           | 76.58     | 15.26      |
| PEDOT:PSS         | FS | 16.90                             | 0.955           | 70.91     | 11.45      |
| PEDOT:PSS (IT-4F) | RS | 17.29                             | 0.980           | 71.79     | 12.16      |
